# Supplementary material for: Structural engineering of bimetallic selenides for high-energy density sodium-ion half/full batteries
Source: Royal Society of Chemistry journal article supplement (doi:10.1039/d2dt03123j), 2022-01-01
Supplement: d2dt03123j1.pdf [file d2dt03123j1.pdf]

**Structural engineering of bimetallic selenides for high-energy density  
sodium-ion half/full batteries**

Jing Zhu<sup>a</sup>, Xiaoyu Chen,<sup>a</sup> Lei Zhang,<sup>c</sup> Quan Wang,<sup>c\*</sup> Jun Yang<sup>b\*</sup>, Hongbo Geng<sup>c\*</sup>

<sup>a</sup>College of Science&State Key Laboratory of Tea Plant Biology and Utilization,  
Anhui Agricultural University, 130 Changjiang West Road, Anhui, 230036, China

<sup>b</sup>School of Material Science & Engineering, Jiangsu University of Science and  
Technology, Zhenjiang, 212003, China

<sup>c</sup>School of Materials Engineering, Changshu Institute of Technology, Changshu,  
Jiangsu 215500, China

E-mail address: [wangquan@cslg.edu.cn](mailto:wangquan@cslg.edu.cn); [iamjyang@just.edu.cn](mailto:iamjyang@just.edu.cn); [hbgeng@gdut.edu.cn](mailto:hbgeng@gdut.edu.cn).

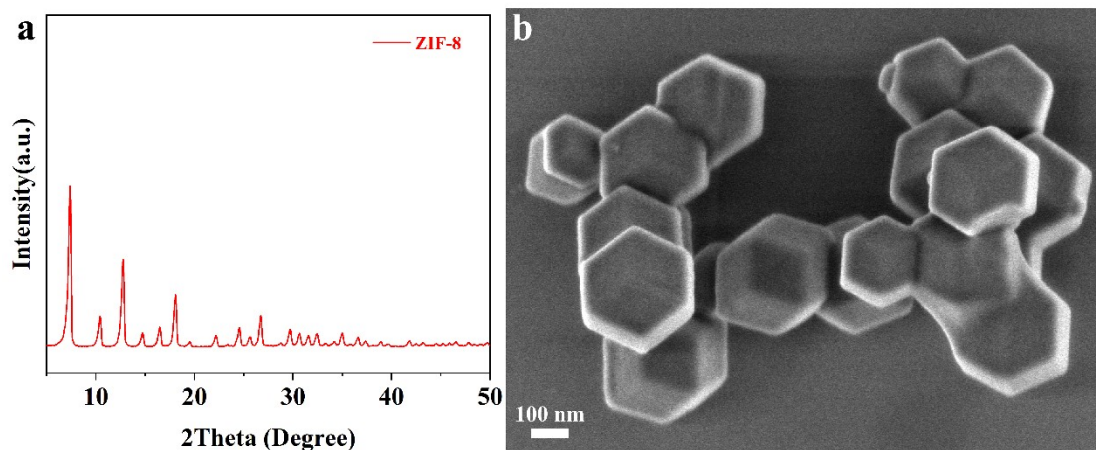

Figure S1. (a) XRD pattern and (b) SEM image of ZIF-8.

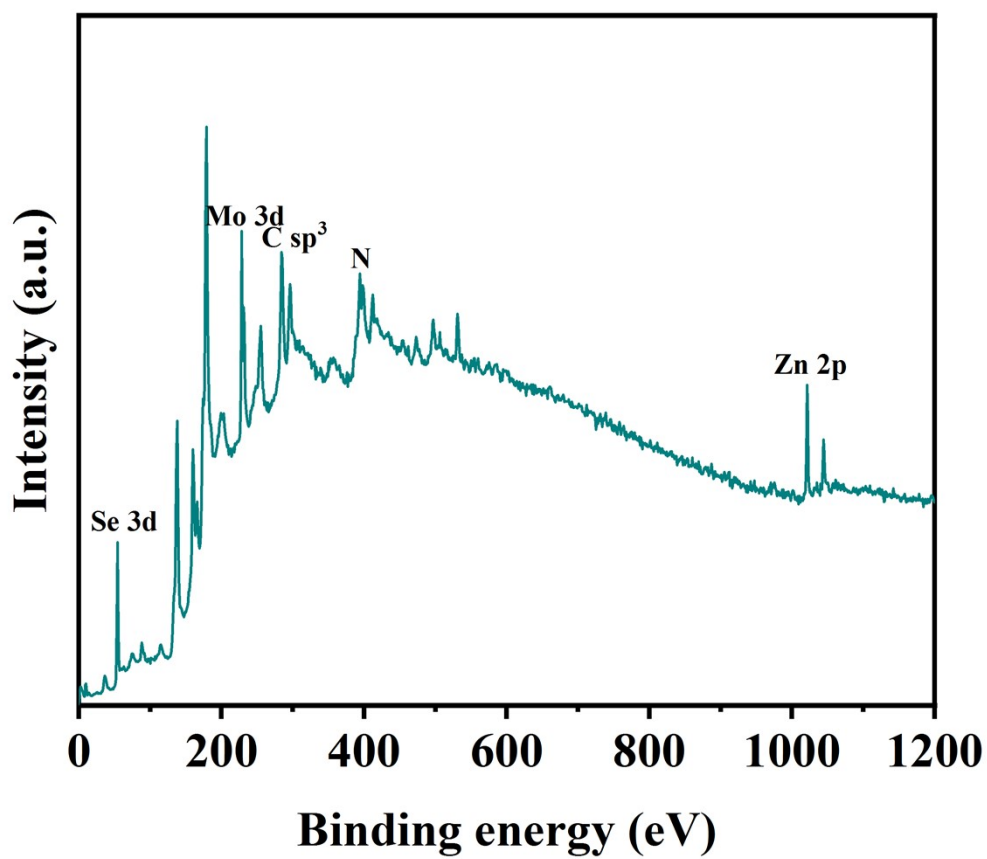

Figure S2. Full XPS survey spectrum of ZnSe/MoSe<sub>2</sub>@NC.

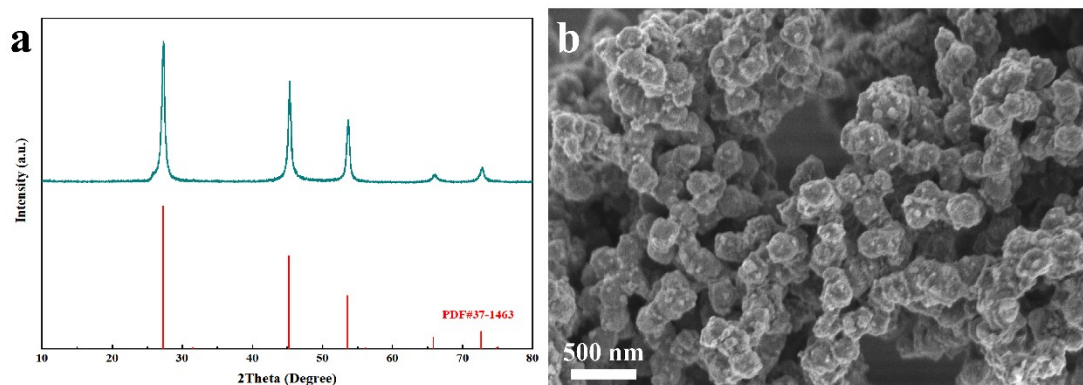

**Figure S3.** (a) XRD pattern and (b) SEM image of ZnSe.

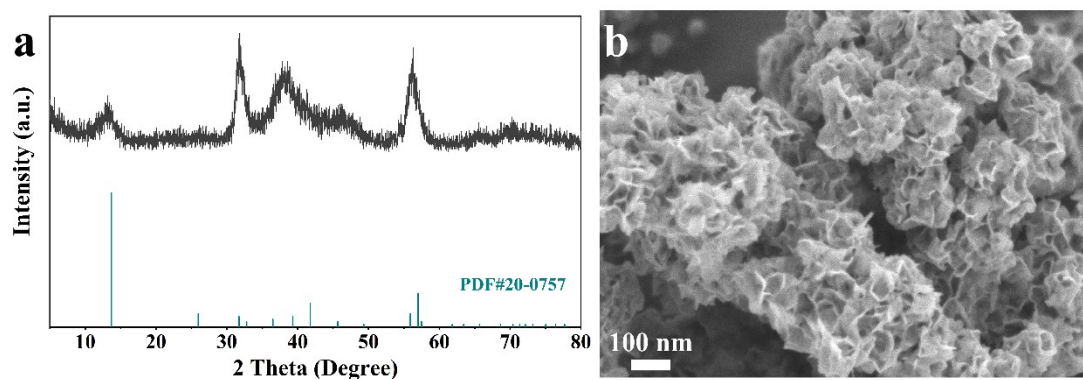

**Figure S4.** (a) XRD pattern and SEM image of MoSe<sub>2</sub>.

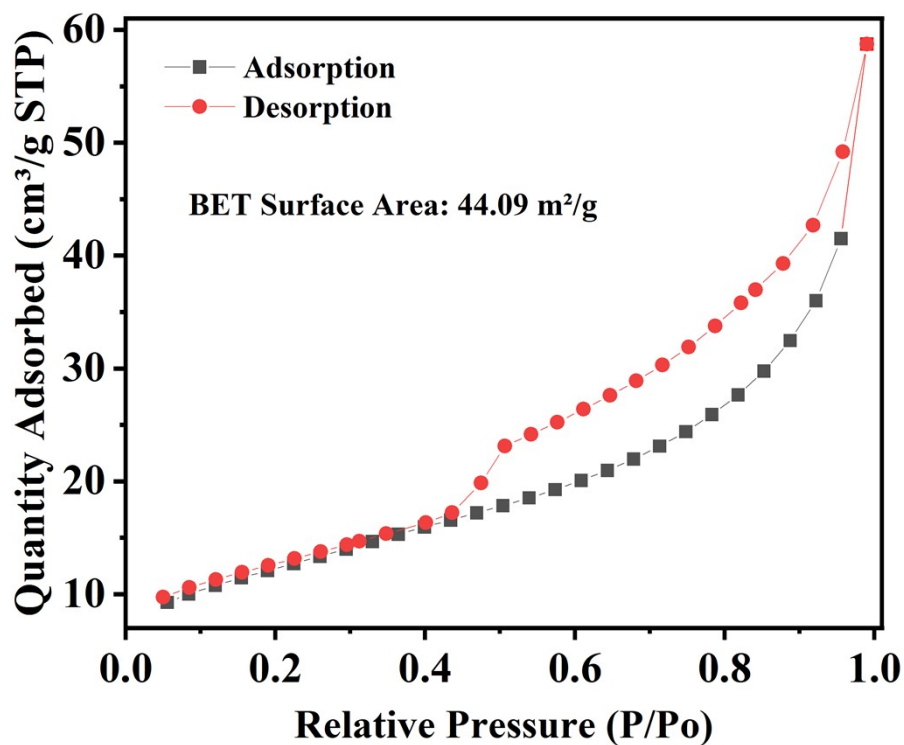

Figure S5. BET surface area of ZnSe/MoSe<sub>2</sub>@NC.

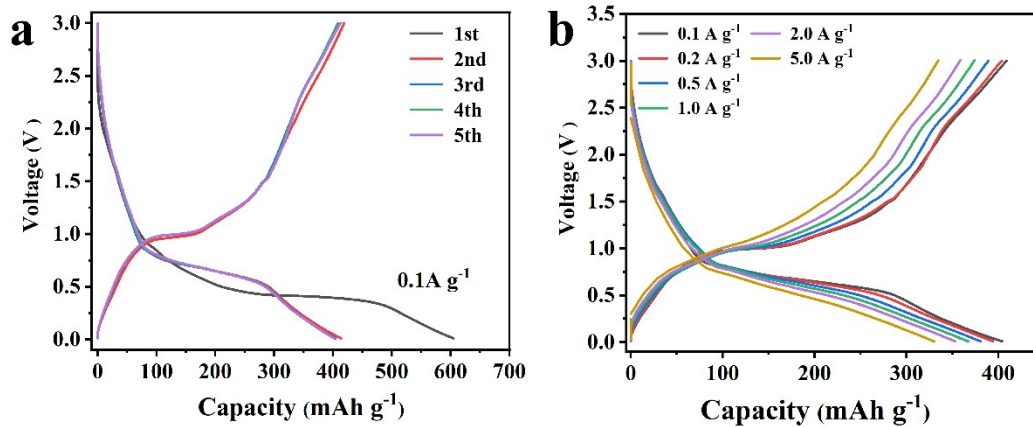

Figure S6. GCD curves of ZnSe: (a) initial 5 cycles at 0.1 A g<sup>-1</sup>; (b) 0.1 to 5 A g<sup>-1</sup>.

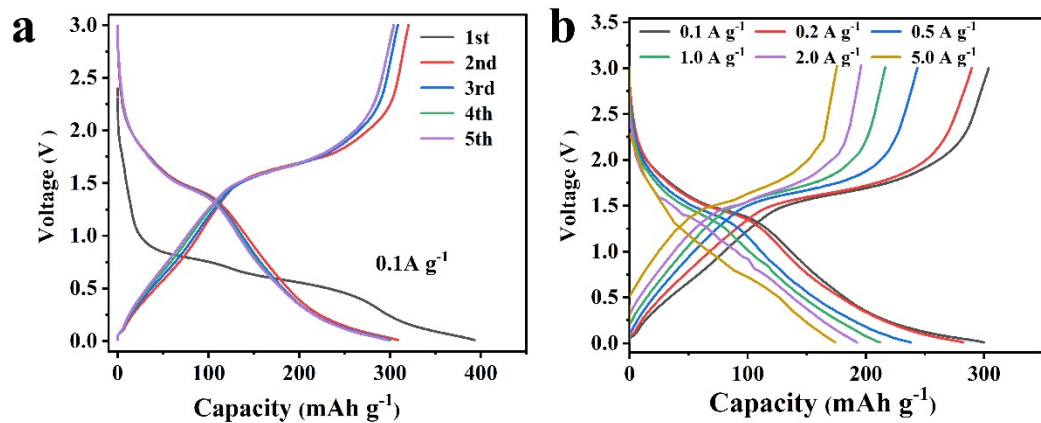

**Figure S7.** GCD curves of MoSe<sub>2</sub>: (a) initial 5 cycles at 0.1 A g<sup>-1</sup>; (b) 0.1 to 5 A g<sup>-1</sup>.

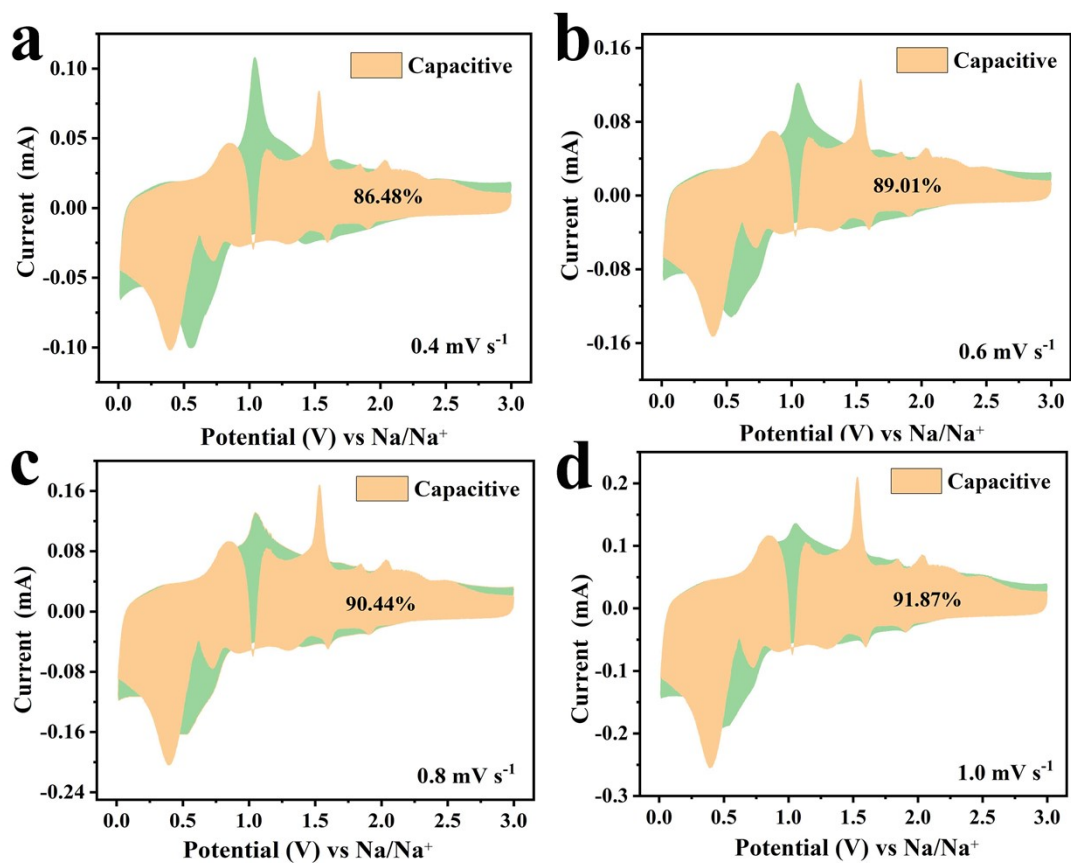

**Figure S8.** Capacitive contribution in CV curves under the scan rate of (a) 0.4 mV s<sup>-1</sup>, (b) 0.6 mV s<sup>-1</sup>, (c) 0.8 mV s<sup>-1</sup> and (d) 1.0 mV s<sup>-1</sup>.
